# Supplementary material for: Integration of mesoporous nickel cobalt oxide nanosheets with ultrathin layer carbon wrapped TiO2 nanotube arrays for high-performance supercapacitors
Source: Royal Society of Chemistry journal article supplement (doi:10.1039/c6nj00359a), 2016-01-01
Supplement: c6nj00359a1.pdf [file c6nj00359a1.pdf]

## Supporting Information

### **Integration of mesoporous nickel cobalt oxides nanosheets with ultrathin layer carbon wrapped TiO<sub>2</sub> nanotube arrays for high-performance supercapacitors**

Cuiping Yu<sup>a</sup>, Yan Wang<sup>\*abc</sup>, Jianfang Zhang<sup>a</sup>, Xia Shu<sup>ac</sup>, Jiewu Cui<sup>ac</sup>, Yongqiang Qin<sup>ac</sup>, Hongmei Zheng<sup>ac</sup>, Jiaqin Liu<sup>ac</sup>, Yong Zhang<sup>ac</sup>, Yucheng Wu<sup>\*ac</sup>

a. School of Materials Science and Engineering, Hefei University of Technology, Hefei 230009, P. R. China.

b. Department of Material Science and NanoEngineering, Rice University, Houston, Texas 77005, United States.

c. Key Laboratory of Advanced Functional Materials and Devices of Anhui Province, Hefei 230009, P. R. China.

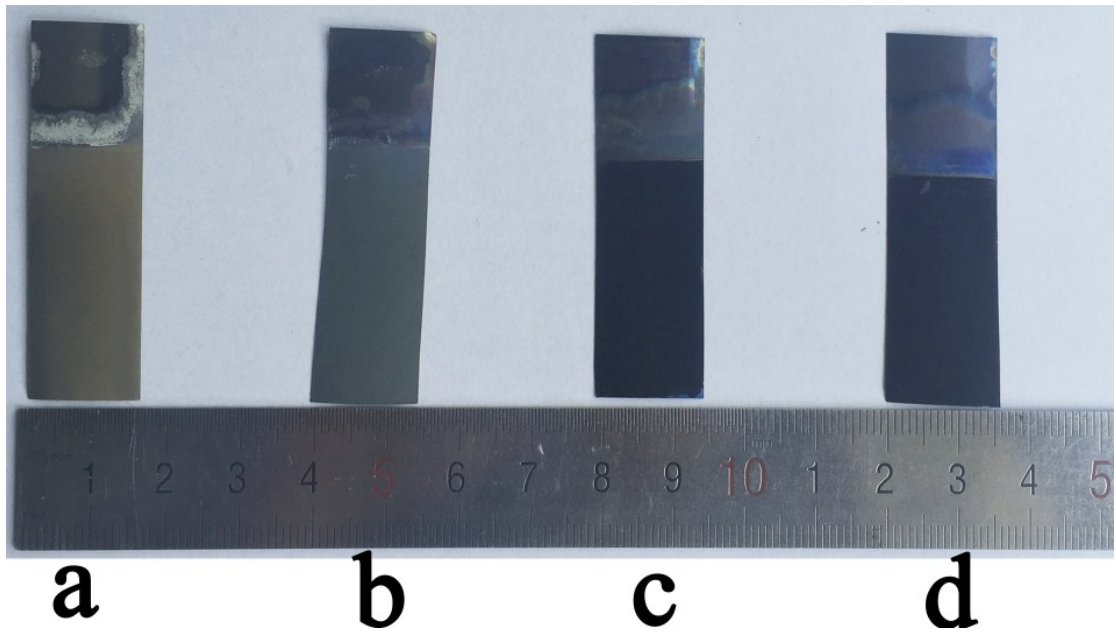

**Fig. S1** Optical photos of a) anodized TNAs; b) TNAs; c) C-TNAs and d) nickel cobalt oxides/C-TNAs.

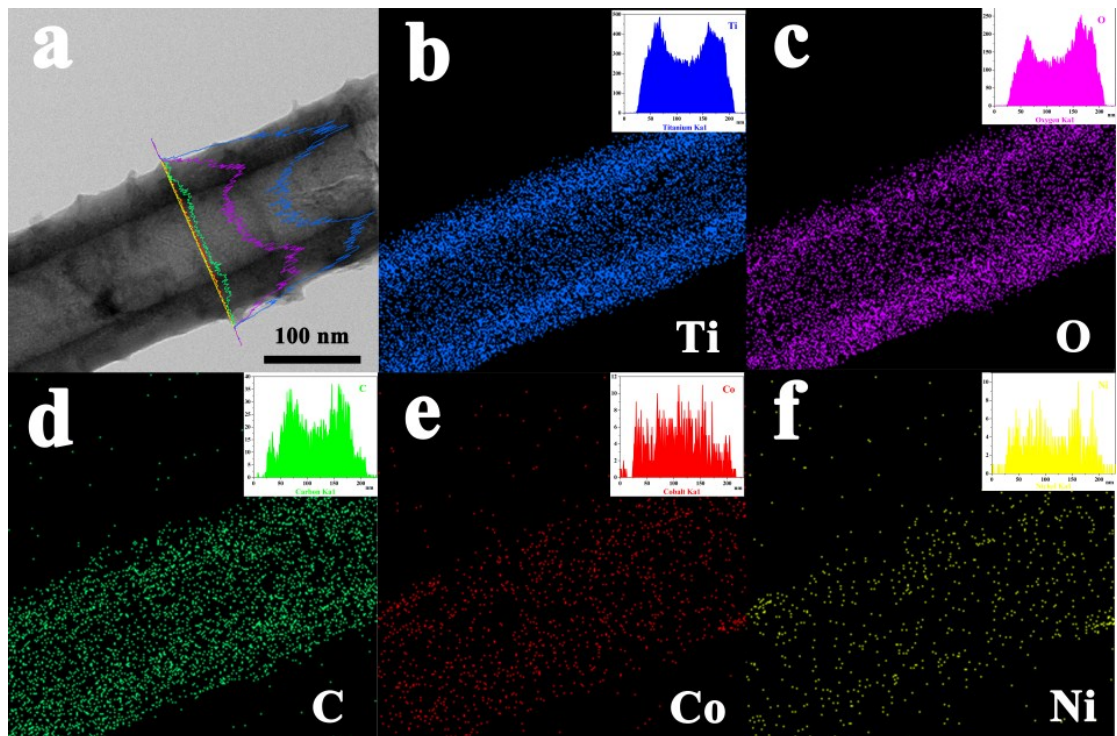

**Fig. S2** a) TEM image of precursor decorated C-TNAs; EDS elemental mapping of b) Ti; c) O; d) C; e) Co and f) Ni. The inset show the corresponding EDS elemental distribution.

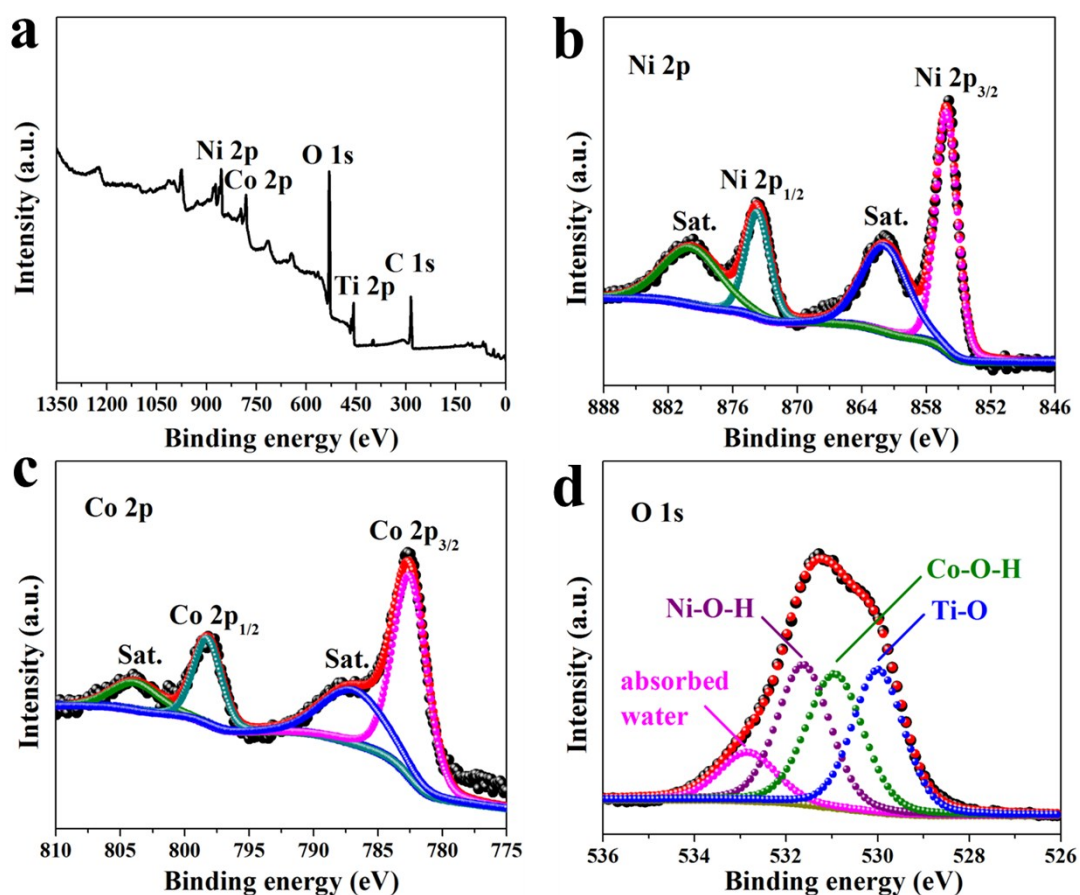

**Fig. S3** a) XPS survey spectrum and b) Ni 2p; c) Co 2p; d) O 1s spectra of precursor of Ni-Co-3:3/C-TNAs.

The XPS survey spectrum clearly shows the presence of Ni, Co, Ti, O and C in the composite (Fig. S3a). The high-resolution XPS spectrum of Ni 2p (Fig. S3b) indicates that the two peaks located at 873.7 eV and 856.1 eV are ascribed to Ni 2p<sub>1/2</sub> and Ni 2p<sub>3/2</sub>, indicating the Ni<sup>2+</sup> in nickel cobalt hydroxides.<sup>[1]</sup> Similarly, in Fig. S3c, the peaks at 798.2 eV and 782.5 eV correspond to Co<sup>2+</sup> in nickel cobalt hydroxides.<sup>[2]</sup> In addition, the O 1s spectra (Fig. S3d) can be divided into four main peaks, Ni-O-H (531.9 eV), Co-O-H (531 eV), Ti-O (529.9 eV) and absorbed water (532.9 eV). In summary, the XPS spectra of precursor of Ni-Co-3:3/C-TNAs can prove that the precursor correspond to nickel cobalt hydroxides.

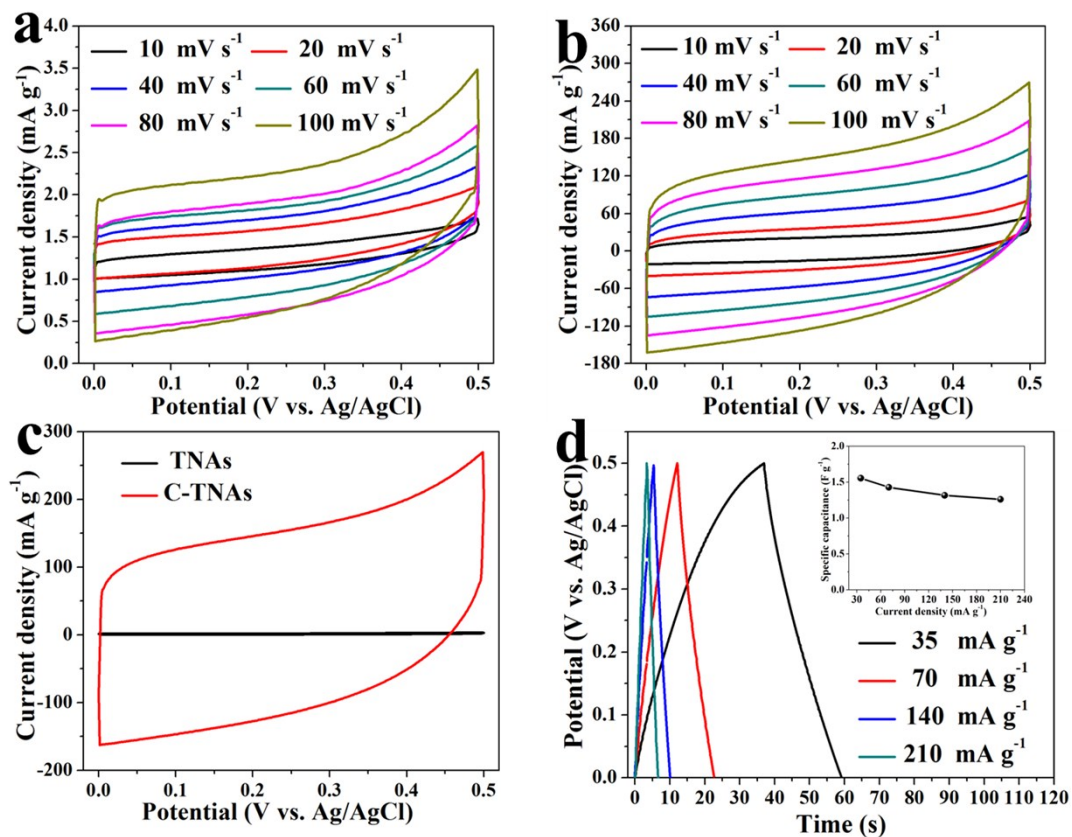

**Fig. S4** CV curves of a) TNAs and b) C-TNAs; c) CV curves of TNAs and C-TNAs at a scan rate of  $100 \text{ mV s}^{-1}$ , d) GCD curves of C-TNAs at different current densities (inset shows the specific capacitance at different current densities).

In Fig. S4c, according to Equation 1 in the main paper, the specific capacitance from CV curve of C-TNAs ( $1.33 \text{ F g}^{-1}$ ) is 83 times higher than that of TNAs ( $16.02 \text{ mF g}^{-1}$ ).

The specific capacitance of C-TNAs in the GCD curves can be calculated using Equation 2 and the result is presented in the inset of Figure S4d, and specific capacitance of C-TNAs can reach  $1.55 \text{ F g}^{-1}$  at current density of  $35 \text{ mA g}^{-1}$ .

**Table S1** Relative BET surface area of TNAs, C-TNAs and nickel cobalt oxides decorated C-TNAs samples attached to Ti foil

| Sample           | Relative BET specific surface area ( $\text{m}^2 \text{cm}^{-2}$ ) |
|------------------|--------------------------------------------------------------------|
| TNAs             | 0.0951                                                             |
| C-TNAs           | 0.1187                                                             |
| Ni-Co-1:5/C-TNAs | 0.1613                                                             |
| Ni-Co-2:4/C-TNAs | 0.1841                                                             |
| Ni-Co-3:3/C-TNAs | 0.1980                                                             |
| Ni-Co-4:2/C-TNAs | 0.1651                                                             |

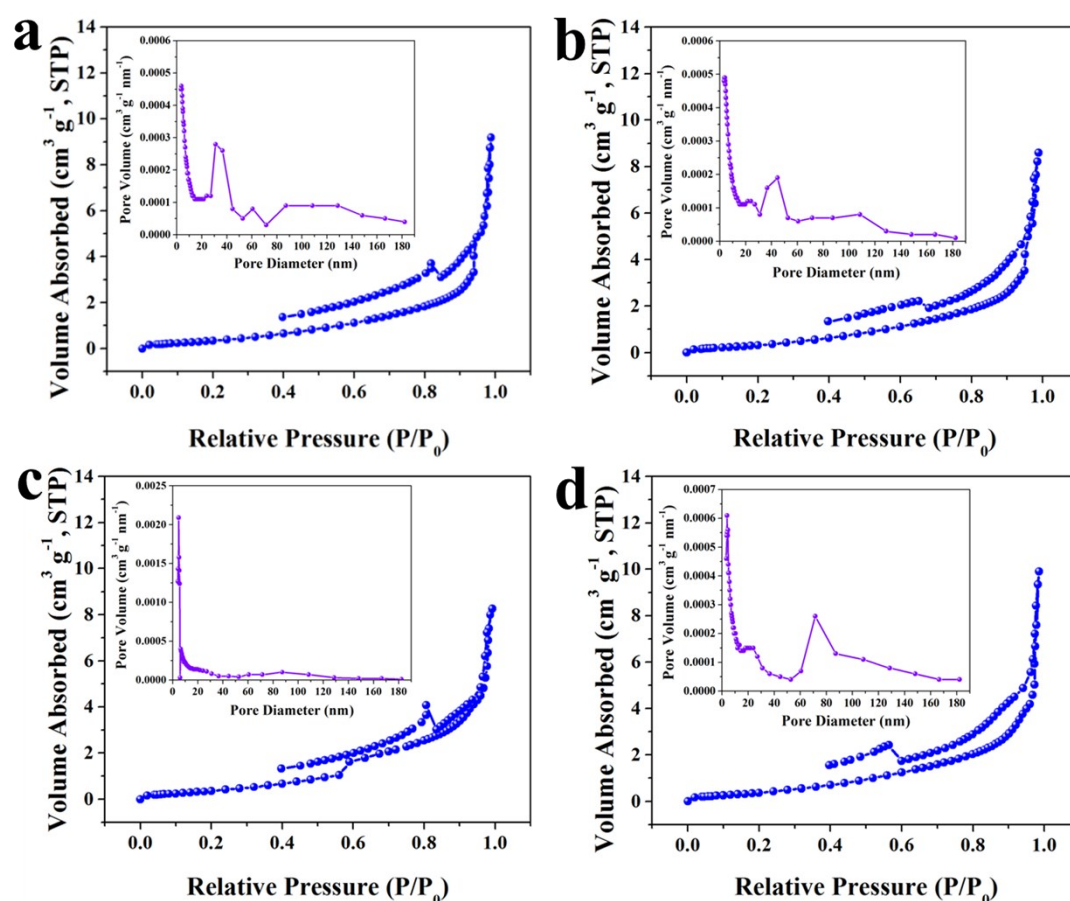

**Fig. S5**  $\text{N}_2$  adsorption and desorption isotherms of a) Ni-Co-1:5/C-TNAs, b) Ni-Co-2:4/C-TNAs, c) Ni-Co-3:3/C-TNAs and d) Ni-Co-4:2/C-TNAs. (insert shows the corresponding pore size distributions).

**Table S2** Percentage of pores with different



diameter in four nickel cobalt oxides decorated C-TNAs

| Pore diameter range (nm) | Percentage (%)    |                   |                   |                   |
|--------------------------|-------------------|-------------------|-------------------|-------------------|
|                          | Ni-Co-1:5 /C-TNAs | Ni-Co-2:4 /C-TNAs | Ni-Co-3:3 /C-TNAs | Ni-Co-4:2 /C-TNAs |
| Under 6                  | 6.80              | 8.98              | 18.58             | 7.08              |
| 6-8                      | 2.84              | 3.80              | 4.83              | 2.84              |
| 8-10                     | 2.03              | 2.75              | 3.33              | 2.11              |
| 10-12                    | 1.90              | 2.50              | 3.17              | 2.07              |
| 12-16                    | 2.40              | 3.16              | 4.04              | 2.80              |
| 16-20                    | 2.80              | 3.51              | 4.51              | 3.37              |
| 20-80                    | 34.93             | 42.47             | 27.00             | 34.19             |
| over 80                  | 46.29             | 32.83             | 34.53             | 45.55             |

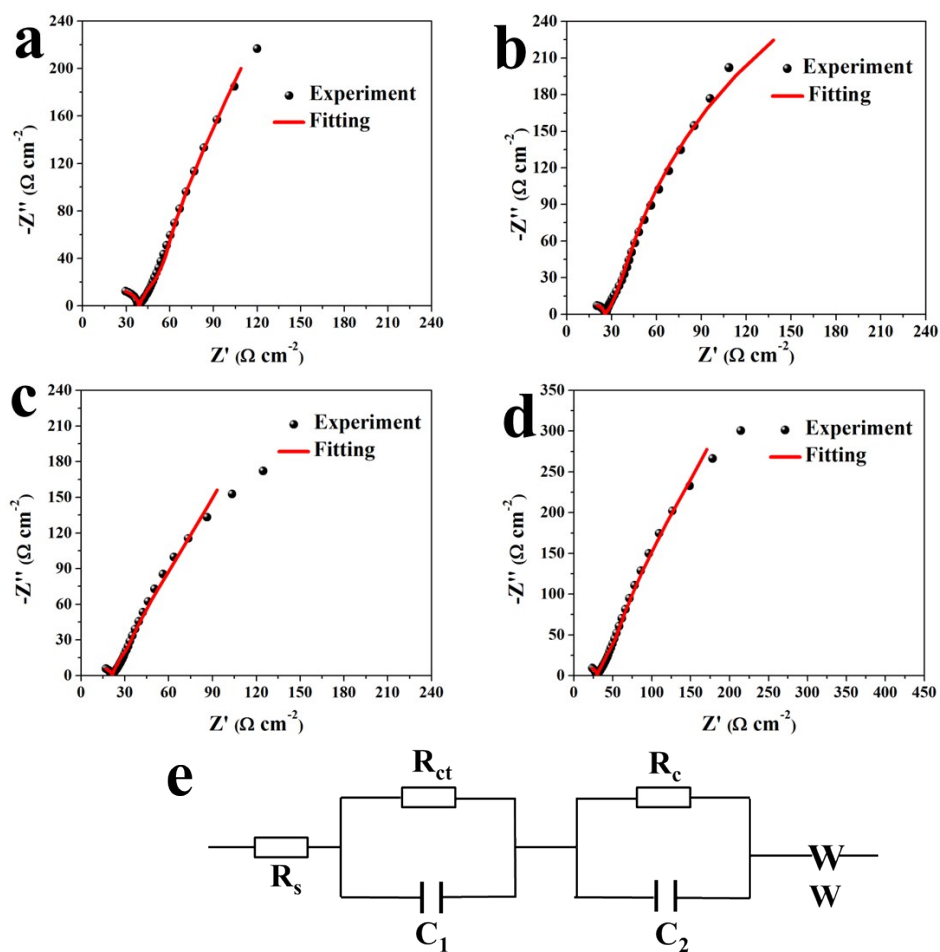

**Fig. S6** Fitting curves of a) Ni-Co-1:5/C-TNAs; b) Ni-Co-2:4/C-TNAs; c) Ni-Co-3:3/C-TNAs; d) Ni-Co-4:2/C-TNAs and e) equivalent circuit.

**Table S3** Fitting results of EIS curves

| <b>Sample</b>    | <b><math>R_s</math> (<math>\Omega \text{ cm}^{-2}</math>)</b> | <b><math>R_{ct}</math> (<math>\Omega \text{ cm}^{-2}</math>)</b> | <b><math>R_c</math> (<math>\Omega \text{ cm}^{-2}</math>)</b> |
|------------------|---------------------------------------------------------------|------------------------------------------------------------------|---------------------------------------------------------------|
| Ni-Co-1:5/C-TNAs | 11.74                                                         | 26.12                                                            | 823.5                                                         |
| Ni-Co-2:4/C-TNAs | 9.60                                                          | 15.66                                                            | 540.5                                                         |
| Ni-Co-3:3/C-TNAs | 7.53                                                          | 12.95                                                            | 337.2                                                         |
| Ni-Co-4:2/C-TNAs | 7.68                                                          | 20.97                                                            | 565.7                                                         |

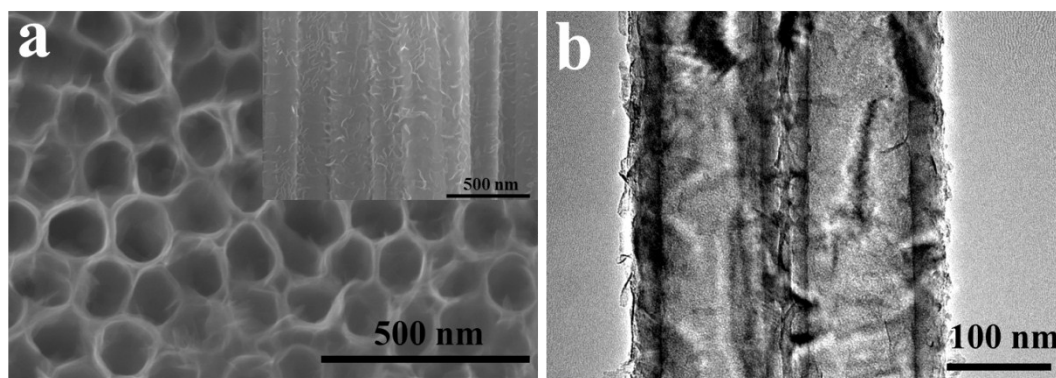

**Fig. S7** a) FESEM image and b) TEM image of Ni-Co-3:3/C-TNAs after cycling for 5000 cycles.

### **Synthesis of nickel oxide/C-TNAs (or cobalt oxide/C-TNAs)**

0.3 mmol  $\text{Ni}(\text{NO}_3)_2 \cdot 6\text{H}_2\text{O}$  (or  $\text{Co}(\text{NO}_3)_2 \cdot 6\text{H}_2\text{O}$ ) was dissolved in 50ml Milli-Q water, and then 1.5 mmol urea ( $\text{CO}(\text{NH}_2)_2$ ) was added into the above aqueous solution. After ultrasonic treatment for 20 min, homogeneous precursor aqueous solution was obtained, and the precursor solution was transferred into 100 ml deposition instruments. And then C-TNAs were placed into the deposition instrument. Subsequently, the deposition instrument was kept in a chemical bath at 80°C for 10 h. After cooling down to room temperature naturally, C-TNAs with loaded precursors were taken out from reaction media, washed with Milli-Q water and ethanol several times to remove the impurities, and then dried at 60 °C overnight. The formed precursor was heated from room temperature to 350 °C with a heating rate of 1 °C min<sup>-1</sup> and maintained at 350 °C for 2 h to obtain the desired nickel oxide/C-TNAs (or cobalt oxide/C-TNAs).



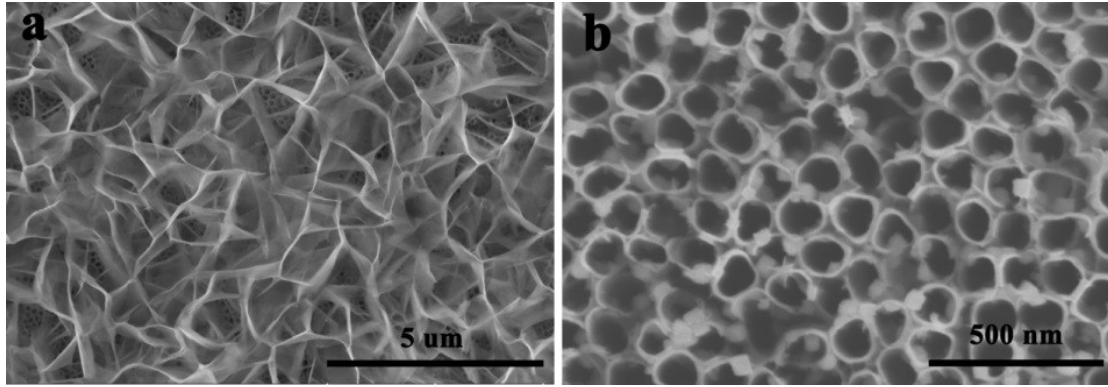

**Fig. S8** FESEM images of a) nickel oxide/C-TNAs; b) cobalt oxide/C-TNAs.

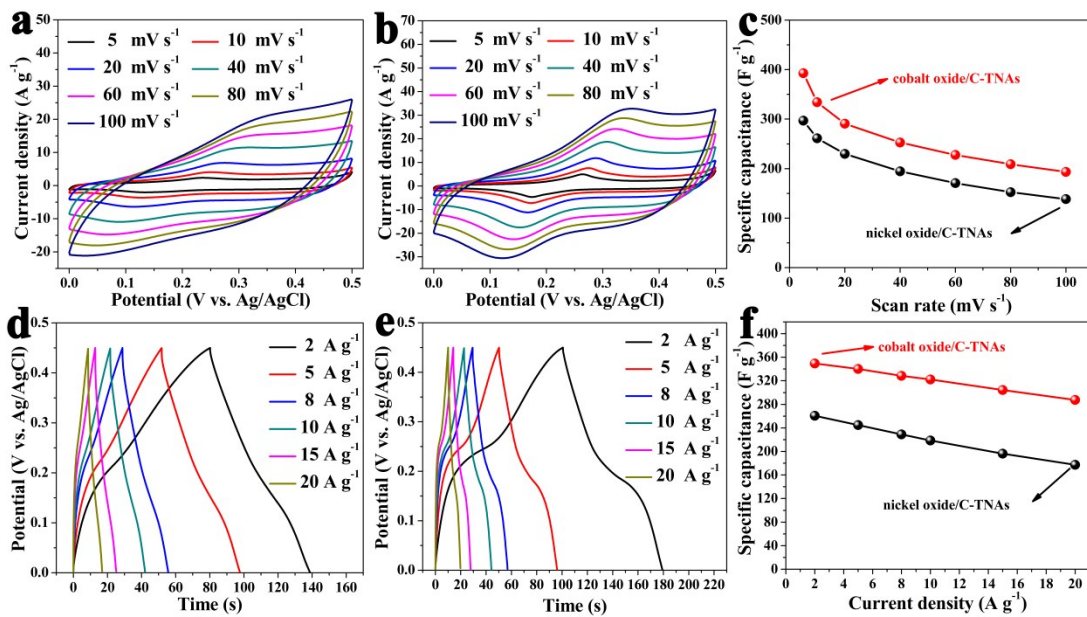

**Fig. S9.** CV curves of a) nickel oxide/C-TNAs; b) cobalt oxide/C-TNAs; c) specific capacitance plots with increasing scan rates; CD curves of c) nickel oxide/C-TNAs; d) cobalt oxide/C-TNAs; e) specific capacitance plots with increasing current densities.

**Table S4** Comparison of supercapacitors based on TNAs-based and nickel cobalt oxides-based electrodes

| Electrode materials                     | Synthesis approach         | Electrolyte                           | Specific capacitance [F g <sup>-1</sup> ] | Ref.      |
|-----------------------------------------|----------------------------|---------------------------------------|-------------------------------------------|-----------|
| MnO <sub>2</sub> /H-TiO <sub>2</sub>    | Electrodeposition          | 0.5 M Na <sub>2</sub> SO <sub>4</sub> | 912 (10 mV s <sup>-1</sup> )              | [3]       |
| PANI/H-TiO <sub>2</sub> NTs             | Polymerization             | 1 M HCl                               | 999 (0.6 A g <sup>-1</sup> )              | [4]       |
| MnO <sub>2</sub> -TiO <sub>2</sub> /C   | Electrochemical deposition | 1 M Na <sub>2</sub> SO <sub>4</sub>   | 580 (2.6 A g <sup>-1</sup> )              | [5]       |
| CNF@NiCo <sub>2</sub> O <sub>4</sub>    | Solution method            | 2 M KOH                               | 902 (2 A g <sup>-1</sup> )                | [6]       |
|                                         | Thermal treatment          |                                       |                                           |           |
| NiCo <sub>2</sub> O <sub>4</sub> arrays | Hydrothermal               | 2 M KOH                               | 1089 (2 A g <sup>-1</sup> )               | [7]       |
| porous NiCo <sub>2</sub> O <sub>4</sub> | Hydrothermal               | 2 M KOH                               | 832 (1 mV s <sup>-1</sup> )               | [8]       |
| nickel cobalt oxides /C-TNAs            | CBD                        | 2 M KOH                               | 934.9 (2 A g <sup>-1</sup> )              | This work |

## References

- 1 C. Shang, S. Dong, S. Wang, D. Xiao, P. Han, X. Wang, L. Gu and G. Cui, *ACS Nano*, 2013, 7, 5430–5436.
- 2 U. M. Patil, M. S. Nam, J. S. Sohn, S. B. Kulkarni, R. Shin, S. Kang, S. Lee, J. H. Kim and S. C. Jun, *J. Mater. Chem. A*, 2014, 2, 19075–19083.
- 3 X. H. Lu, G. M. Wang, T. Zhai, M. H. Yu, J. Y. Gan, Y. X. Tong and Y. Li, *Nano Lett.*, 2012, 12, 1690.
- 4 J. q. Chen, Z. B. Xia, H. Li, Q. Li and Y. J. Zhang, *Electrochim. Acta*, 2015, **166**, 174.
- 5 B. Gao, X. X. Li, Y. W. Ma, Y. Cao, Z. Y. Hu, X. M. Zhang, J. J. Fu, K. F. Huo and P. K. Chu, *Thin Solid Films*, 2015, 584, 61.
- 6 G. Q. Zhang and X. W. Lou, *Sci. Rep.*, 2013, **3**, 1470.
- 7 X.Y. Liu, Y.Q. Zhang, X.H. Xia, S.J. Shi, Y. Lu, X.L. Wang, C.D. Gu and J.P. Tu, *J. Power Sources*, 2013, **239**, 157.
- 8 T. Zhu, E. R. Koo and G. W. Ho, *RSC Adv.*, 2015, **5**, 1697.
